# Supplementary material for: Benchmarking Density Functional Approximations for Excited-State Properties of Fluorescent Dyes
Source: MDPI journal article supplement (doi:10.3390/molecules26247434), 2021-12-08
Supplement: s1 [file s1]

**Supporting Information:**

**Benchmarking Density Functional**

**Approximations for Excited-State Properties of**

**Fluorescent Dyes**

Anna M. Grabarz<sup>\*,†</sup> and Borys Ośmiałowski<sup>\*,‡</sup>

<sup>†</sup>*Faculty of Chemistry, Wrocław University of Science and Technology, Wyb. Wyspiańskiego 27,  
PL-50370 Wrocław, Poland*

<sup>‡</sup>*Faculty of Chemistry, Nicolaus Copernicus University, Gagarina 7, PL-87100 Toruń, Poland*

E-mail: anna.grabarz@pwr.edu.pl; borys.osmialowski@umk.pl

# S1 Examined structures

## S1.1 Difluoroboranes

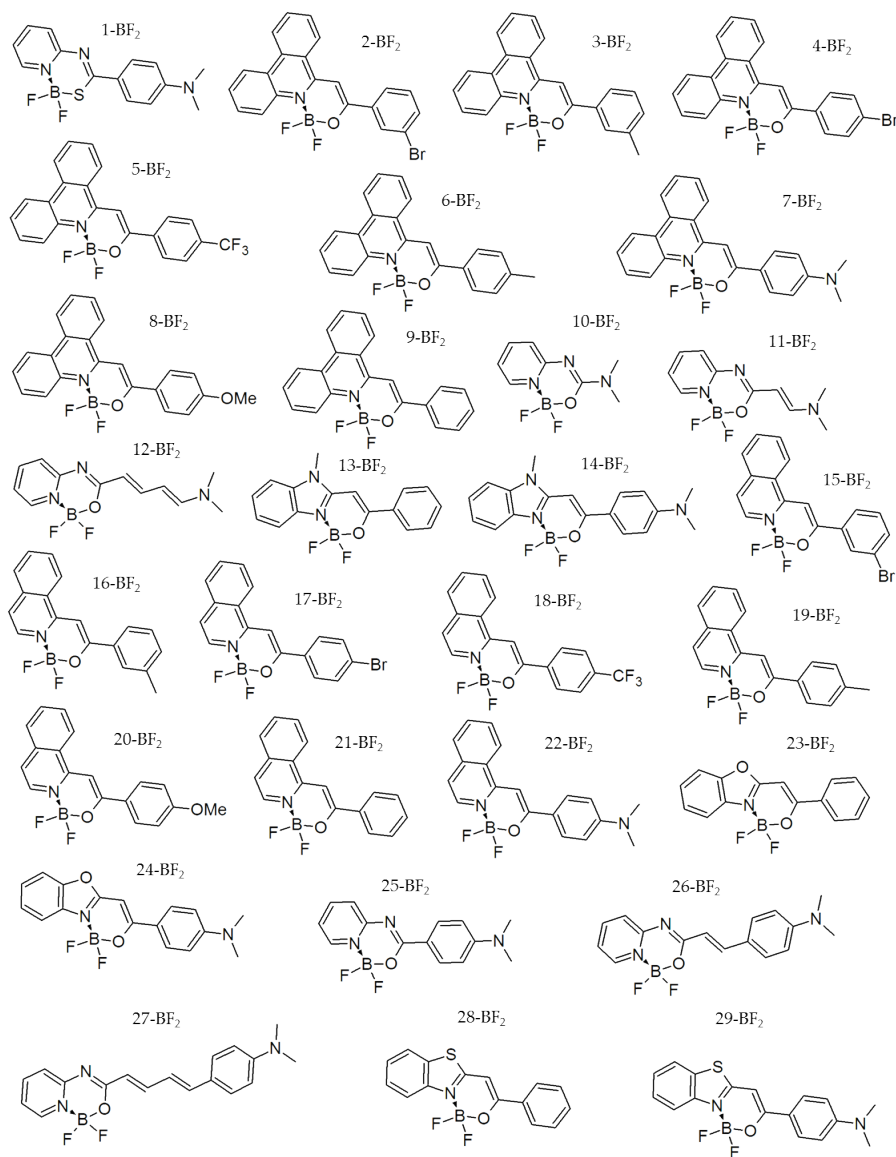

Figure S1: Difluoroborane structures (BF<sub>2</sub>) studied herein.

## S1.2 HPIP derivatives

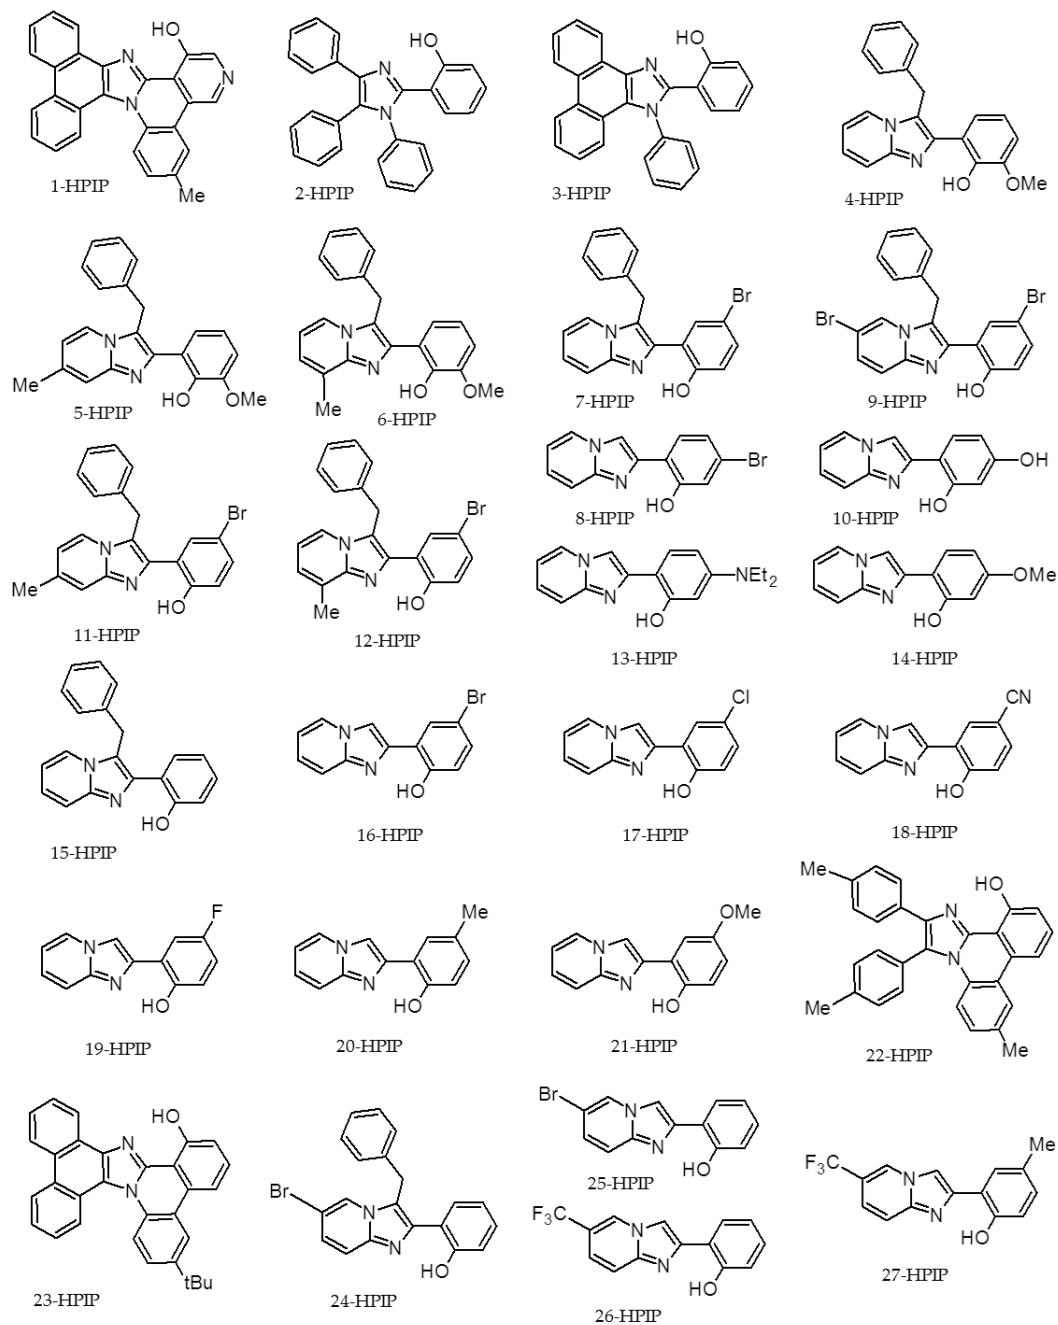

Figure S2: HPIP structures studied herein.

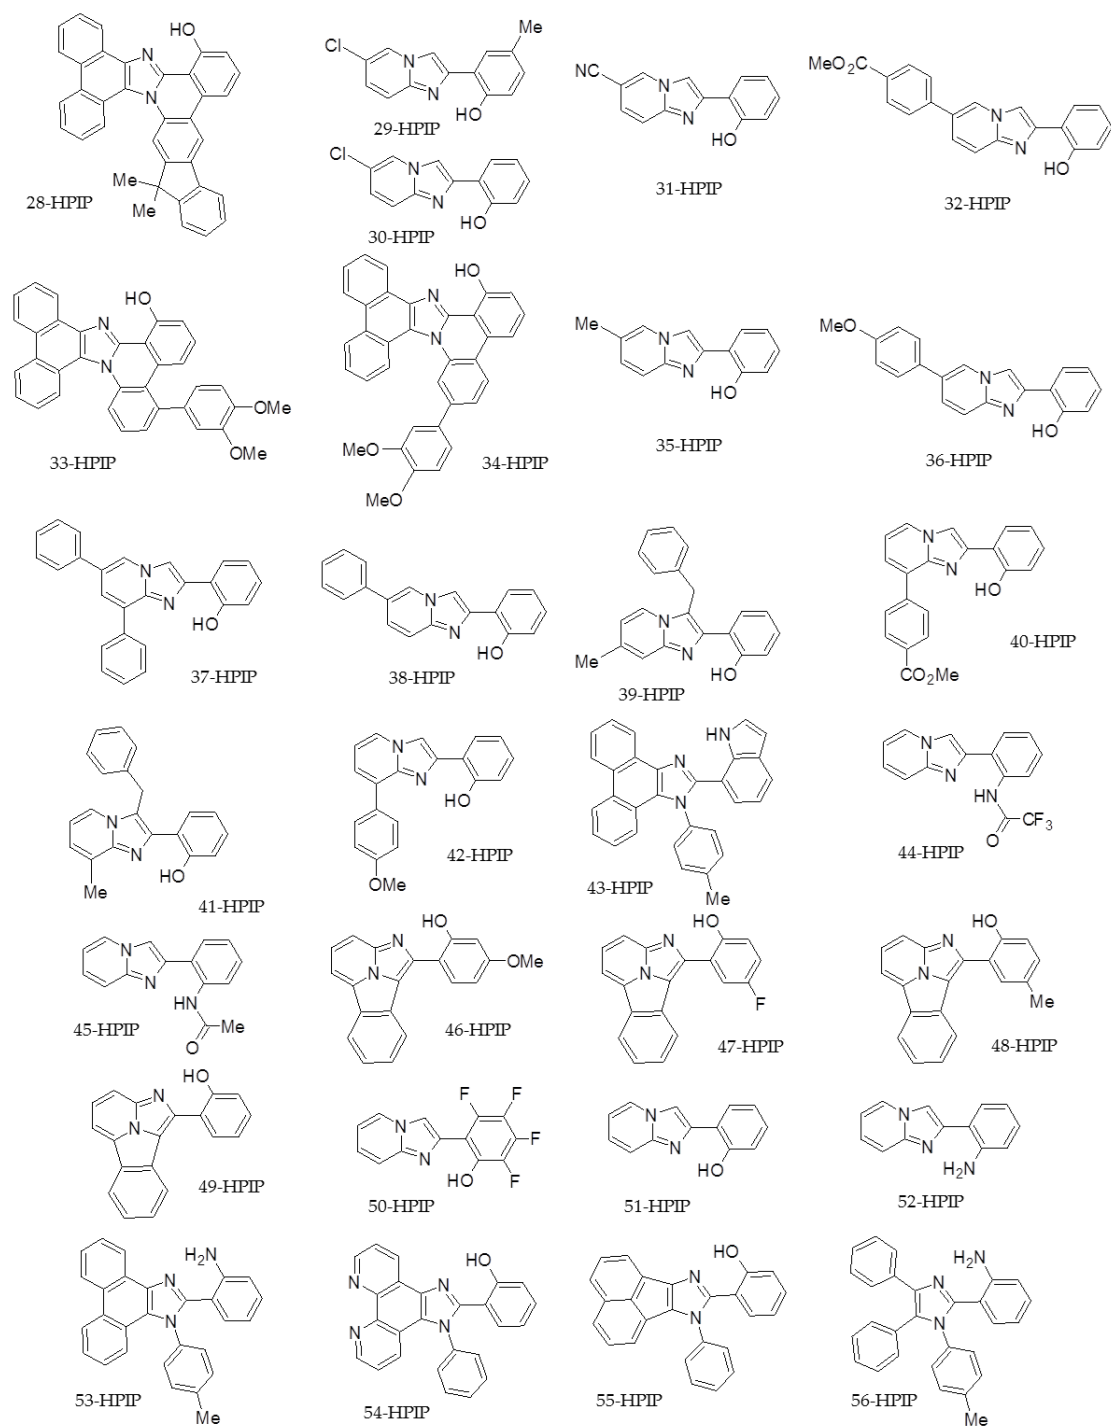

Figure S3: HPIP derivative structures studied herein



## S2 Reference data

### S2.1 Difluoroboranes

Table S1: CC2 simulations performed in the gas phase.

| Struct.            | Exc. energy | Dipole moments    |                   |                                     |
|--------------------|-------------|-------------------|-------------------|-------------------------------------|
|                    |             | $\mu_{\text{GS}}$ | $\mu_{\text{ES}}$ | $\mu_{\text{ES}} - \mu_{\text{GS}}$ |
| 1-BF <sub>2</sub>  | 3.155       | 6.537             | 16.165            | 9.628                               |
| 2-BF <sub>2</sub>  | 3.216       | 7.525             | 6.021             | -1.504                              |
| 3-BF <sub>2</sub>  | 3.199       | 5.445             | 4.107             | -1.337                              |
| 4-BF <sub>2</sub>  | 3.196       | 6.443             | 4.822             | -1.621                              |
| 5-BF <sub>2</sub>  | 3.223       | 7.352             | 6.267             | -1.085                              |
| 6-BF <sub>2</sub>  | 3.188       | 5.823             | 4.656             | -1.167                              |
| 7-BF <sub>2</sub>  | 2.940       | 6.991             | 11.764            | 4.773                               |
| 8-BF <sub>2</sub>  | 3.137       | 4.645             | 4.829             | 0.184                               |
| 9-BF <sub>2</sub>  | 3.216       | 5.863             | 4.412             | -1.451                              |
| 10-BF <sub>2</sub> | 4.002       | 4.325             | 5.703             | 1.378                               |
| 11-BF <sub>2</sub> | 3.631       | 7.277             | 10.383            | 3.106                               |
| 12-BF <sub>2</sub> | 3.324       | 8.850             | 15.121            | 6.271                               |
| 13-BF <sub>2</sub> | 3.761       | 7.445             | 7.469             | 0.024                               |
| 14-BF <sub>2</sub> | 3.420       | 8.281             | 11.831            | 3.550                               |
| 15-BF <sub>2</sub> | 3.320       | 5.487             | 3.787             | -1.700                              |
| 16-BF <sub>2</sub> | 3.289       | 6.661             | 5.549             | -1.112                              |
| 17-BF <sub>2</sub> | 3.289       | 6.989             | 5.079             | -1.911                              |
| 18-BF <sub>2</sub> | 3.324       | 7.827             | 5.993             | -1.834                              |
| 19-BF <sub>2</sub> | 3.271       | 6.347             | 5.503             | -0.844                              |
| 20-BF <sub>2</sub> | 3.208       | 7.483             | 7.555             | 0.071                               |
| 21-BF <sub>2</sub> | 3.303       | 6.413             | 5.105             | -1.309                              |
| 22-BF <sub>2</sub> | 2.999       | 7.151             | 12.113            | 4.962                               |
| 23-BF <sub>2</sub> | 3.757       | 4.584             | 4.849             | 0.265                               |
| 24-BF <sub>2</sub> | 3.367       | 6.417             | 11.748            | 5.331                               |
| 25-BF <sub>2</sub> | 3.457       | 5.527             | 14.075            | 8.549                               |
| 26-BF <sub>2</sub> | 3.204       | 7.371             | 17.489            | 10.118                              |
| 27-BF <sub>2</sub> | 3.037       | 8.457             | 21.386            | 12.929                              |
| 28-BF <sub>2</sub> | 3.523       | 4.547             | 4.466             | -0.081                              |
| 29-BF <sub>2</sub> | 3.179       | 6.344             | 11.534            | 5.190                               |

## **S2.2 HPIP derivatives**

Table S2: CC2 simulations performed in the gas phase.

| Struct. | Exc. energy | Dipole moments |            |                     |
|---------|-------------|----------------|------------|---------------------|
|         |             | $\mu_{GS}$     | $\mu_{ES}$ | $\mu_{ES}-\mu_{GS}$ |
| 1-HPIP  | 3.632       | 5.696          | 6.515      | 0.819               |
| 2-HPIP  | 4.091       | 5.630          | 3.606      | -2.024              |
| 3-HPIP  | 3.764       | 5.045          | 5.272      | 0.227               |
| 4-HPIP  | 3.815       | 4.079          | 5.489      | 1.410               |
| 5-HPIP  | 3.839       | 4.345          | 4.655      | 0.310               |
| 6-HPIP  | 3.897       | 3.683          | 5.118      | 1.434               |
| 7-HPIP  | 3.838       | 5.833          | 2.568      | -3.265              |
| 8-HPIP  | 3.920       | 7.138          | 3.059      | -4.079              |
| 9-HPIP  | 3.709       | 4.073          | 3.758      | -0.315              |
| 10-HPIP | 3.824       | 4.316          | 5.082      | 0.766               |
| 11-HPIP | 3.855       | 6.401          | 2.491      | -3.910              |
| 12-HPIP | 3.906       | 5.669          | 2.115      | -3.554              |
| 13-HPIP | 3.516       | 3.196          | 12.782     | 9.586               |
| 14-HPIP | 3.780       | 3.649          | 6.512      | 2.863               |
| 15-HPIP | 3.846       | 5.252          | 4.454      | -0.798              |
| 16-HPIP | 3.897       | 5.864          | 1.560      | -4.304              |
| 17-HPIP | 3.898       | 5.826          | 1.484      | -4.342              |
| 18-HPIP | 4.002       | 7.780          | 2.528      | -5.252              |
| 19-HPIP | 3.878       | 5.569          | 1.594      | -3.975              |
| 20-HPIP | 3.845       | 5.120          | 4.820      | -0.300              |
| 21-HPIP | 3.708       | 4.193          | 4.545      | 0.351               |
| 22-HPIP | 3.714       | 4.027          | 3.407      | -0.620              |
| 23-HPIP | 3.619       | 4.030          | 3.200      | -0.830              |
| 24-HPIP | 3.701       | 3.693          | 5.770      | 2.077               |
| 25-HPIP | 3.750       | 3.486          | 5.961      | 2.475               |
| 26-HPIP | 3.719       | 2.334          | 8.189      | 5.855               |
| 27-HPIP | 3.785       | 2.260          | 7.028      | 4.768               |
| 28-HPIP | 3.553       | 4.164          | 3.160      | -1.004              |
| 29-HPIP | 3.707       | 3.331          | 7.050      | 3.719               |
| 30-HPIP | 3.769       | 3.410          | 5.884      | 2.473               |
| 31-HPIP | 3.633       | 1.378          | 8.585      | 7.207               |
| 32-HPIP | 3.703       | 5.117          | 7.536      | 2.419               |
| 33-HPIP | 3.505       | 5.387          | 6.266      | 0.879               |
| 34-HPIP | 3.554       | 4.683          | 3.766      | -0.917              |
| 35-HPIP | 3.919       | 5.868          | 3.894      | -1.974              |
| 36-HPIP | 3.798       | 7.030          | 4.727      | -2.303              |
| 37-HPIP | 3.645       | 5.023          | 6.128      | 1.105               |
| 38-HPIP | 3.779       | 5.644          | 4.548      | -1.097              |
| 39-HPIP | 3.864       | 5.610          | 3.889      | -1.721              |
| 40-HPIP | 3.639       | 4.447          | 9.811      | 5.364               |
| 41-HPIP | 3.931       | 4.915          | 3.990      | -0.925              |
| 42-HPIP | 3.798       | 3.442          | 5.810      | 2.368               |
| 43-HPIP | 3.825       | 3.535          | 3.721      | 0.186               |
| 44-HPIP | 4.100       | 7.401          | 6.115      | -1.286              |
| 45-HPIP | 4.016       | 5.520          | 5.630      | 0.110               |
| 46-HPIP | 3.123       | 2.573          | 2.080      | -0.493              |
| 47-HPIP | 3.176       | 4.913          | 1.853      | -3.059              |
| 48-HPIP | 3.155       | 4.338          | 2.231      | -2.107              |
| 49-HPIP | 3.190       | 4.516          | 2.339      | -2.177              |
| 50-HPIP | 4.066       | 7.657          | 2.463      | -5.194              |
| 51-HPIP | 3.903       | 5.255          | 4.049      | -1.206              |
| 52-HPIP | 3.745       | 3.061          | 4.065      | 1.004               |
| 53-HPIP | 3.763       | 3.178          | 5.638      | 2.460               |
| 54-HPIP | 3.776       | 5.803          | 9.599      | 3.797               |
| 55-HPIP | 2.945       | 5.179          | 7.031      | 1.853               |
| 56-HPIP | 4.025       | 3.421          | 1.586      | -1.835              |

## S3 XCFs accuracy - vertical energy

|                    | SVWN  | BLYP  | M06-L | TPSSH | B3LYP | X3LYP  | APF-D  | PBE0   | M06    | SOGGA11-X | BMK    | MN15   | M06-2X | M06-HF | LC-BLYP | CAM-B3LYP | ωB97X       | ωB97X-D    |
|--------------------|-------|-------|-------|-------|-------|--------|--------|--------|--------|-----------|--------|--------|--------|--------|---------|-----------|-------------|------------|
|                    | X=0   | X=0   | X=0   | X=10  | X=20  | X=21.8 | X=23   | X=25   | X=27   | X=40.15   | X=42   | X=44   | X=54   | X=100  | X=0-100 | X=19-65   | X=15.77-100 | X=22.2-100 |
| 1-BF <sub>2</sub>  | 0.728 | 0.691 | 0.458 | 0.302 | 0.139 | 0.101  | 0.063  | 0.019  | 0.005  | -0.287    | -0.225 | -0.175 | -0.300 | -0.513 | -0.607  | -0.341    | -0.534      | -0.413     |
| 2-BF <sub>2</sub>  | 0.459 | 0.449 | 0.254 | 0.205 | 0.132 | 0.109  | 0.081  | 0.054  | 0.085  | -0.144    | -0.132 | -0.033 | -0.149 | -0.327 | -0.408  | -0.164    | -0.306      | -0.192     |
| 3-BF <sub>2</sub>  | 0.427 | 0.423 | 0.231 | 0.190 | 0.120 | 0.098  | 0.070  | 0.043  | 0.073  | -0.151    | -0.138 | -0.039 | -0.152 | -0.316 | -0.405  | -0.169    | -0.308      | -0.197     |
| 4-BF <sub>2</sub>  | 0.459 | 0.453 | 0.262 | 0.215 | 0.141 | 0.118  | 0.090  | 0.063  | 0.093  | -0.138    | -0.124 | -0.027 | -0.143 | -0.324 | -0.404  | -0.159    | -0.303      | -0.189     |
| 5-BF <sub>2</sub>  | 0.457 | 0.456 | 0.269 | 0.224 | 0.148 | 0.125  | 0.098  | 0.071  | 0.102  | -0.129    | -0.119 | -0.021 | -0.141 | -0.325 | -0.399  | -0.151    | -0.295      | -0.180     |
| 6-BF <sub>2</sub>  | 0.425 | 0.420 | 0.230 | 0.189 | 0.120 | 0.098  | 0.071  | 0.044  | 0.072  | -0.151    | -0.136 | -0.038 | -0.150 | -0.314 | -0.403  | -0.168    | -0.307      | -0.197     |
| 7-BF <sub>2</sub>  | 0.589 | 0.547 | 0.349 | 0.244 | 0.123 | 0.093  | 0.068  | 0.034  | 0.025  | -0.203    | -0.171 | -0.097 | -0.204 | -0.372 | -0.490  | -0.244    | -0.403      | -0.289     |
| 8-BF <sub>2</sub>  | 0.466 | 0.452 | 0.256 | 0.201 | 0.120 | 0.096  | 0.069  | 0.041  | 0.061  | -0.163    | -0.144 | -0.048 | -0.160 | -0.324 | -0.416  | -0.180    | -0.322      | -0.212     |
| 9-BF <sub>2</sub>  | 0.420 | 0.419 | 0.229 | 0.189 | 0.120 | 0.098  | 0.071  | 0.044  | 0.073  | -0.150    | -0.137 | -0.038 | -0.150 | -0.314 | -0.402  | -0.165    | -0.304      | -0.193     |
| 10-BF <sub>2</sub> | 0.624 | 0.577 | 0.288 | 0.194 | 0.090 | 0.059  | 0.017  | -0.019 | 0.003  | -0.272    | -0.222 | -0.107 | -0.234 | -0.363 | -0.413  | -0.223    | -0.341      | -0.248     |
| 11-BF <sub>2</sub> | 0.714 | 0.676 | 0.390 | 0.257 | 0.128 | 0.095  | 0.047  | 0.010  | 0.015  | -0.249    | -0.191 | -0.093 | -0.193 | -0.266 | -0.412  | -0.219    | -0.355      | -0.262     |
| 12-BF <sub>2</sub> | 0.705 | 0.676 | 0.416 | 0.275 | 0.154 | 0.125  | 0.083  | 0.050  | 0.053  | -0.181    | -0.122 | -0.046 | -0.134 | -0.237 | -0.374  | -0.169    | -0.310      | -0.214     |
| 13-BF <sub>2</sub> | 0.551 | 0.565 | 0.363 | 0.301 | 0.226 | 0.202  | 0.164  | 0.135  | 0.190  | -0.074    | -0.072 | 0.034  | -0.086 | -0.270 | -0.341  | -0.093    | -0.245      | -0.132     |
| 14-BF <sub>2</sub> | 0.520 | 0.495 | 0.268 | 0.215 | 0.133 | 0.110  | 0.073  | 0.044  | 0.074  | -0.176    | -0.149 | -0.059 | -0.164 | -0.328 | -0.432  | -0.189    | -0.349      | -0.237     |
| 15-BF <sub>2</sub> | 0.432 | 0.431 | 0.244 | 0.209 | 0.149 | 0.128  | 0.102  | 0.078  | 0.122  | -0.099    | -0.092 | 0.008  | -0.098 | -0.254 | -0.312  | -0.105    | -0.223      | -0.125     |
| 16-BF <sub>2</sub> | 0.423 | 0.421 | 0.230 | 0.197 | 0.138 | 0.118  | 0.091  | 0.066  | 0.107  | -0.110    | -0.101 | -0.002 | -0.105 | -0.251 | -0.319  | -0.116    | -0.233      | -0.137     |
| 17-BF <sub>2</sub> | 0.475 | 0.468 | 0.274 | 0.228 | 0.163 | 0.142  | 0.114  | 0.089  | 0.130  | -0.094    | -0.085 | 0.013  | -0.095 | -0.257 | -0.316  | -0.105    | -0.227      | -0.128     |
| 18-BF <sub>2</sub> | 0.450 | 0.450 | 0.265 | 0.231 | 0.166 | 0.145  | 0.119  | 0.094  | 0.137  | -0.085    | -0.079 | 0.020  | -0.089 | -0.252 | -0.305  | -0.094    | -0.214      | -0.115     |
| 19-BF <sub>2</sub> | 0.433 | 0.428 | 0.237 | 0.201 | 0.140 | 0.120  | 0.093  | 0.068  | 0.107  | -0.110    | -0.100 | -0.001 | -0.105 | -0.252 | -0.320  | -0.116    | -0.235      | -0.139     |
| 20-BF <sub>2</sub> | 0.501 | 0.486 | 0.284 | 0.223 | 0.144 | 0.121  | 0.093  | 0.066  | 0.096  | -0.126    | -0.110 | -0.014 | -0.120 | -0.271 | -0.343  | -0.135    | -0.259      | -0.162     |
| 21-BF <sub>2</sub> | 0.418 | 0.418 | 0.229 | 0.197 | 0.138 | 0.118  | 0.091  | 0.067  | 0.108  | -0.108    | -0.099 | 0.000  | -0.103 | -0.249 | -0.316  | -0.113    | -0.229      | -0.133     |
| 22-BF <sub>2</sub> | 0.643 | 0.600 | 0.396 | 0.280 | 0.155 | 0.125  | 0.098  | 0.064  | 0.061  | -0.170    | -0.141 | -0.067 | -0.170 | -0.331 | -0.430  | -0.205    | -0.350      | -0.246     |
| 23-BF <sub>2</sub> | 0.523 | 0.535 | 0.333 | 0.279 | 0.205 | 0.182  | 0.145  | 0.116  | 0.157  | -0.092    | -0.079 | 0.029  | -0.092 | -0.233 | -0.329  | -0.100    | -0.244      | -0.136     |
| 24-BF <sub>2</sub> | 0.490 | 0.461 | 0.235 | 0.183 | 0.099 | 0.074  | 0.041  | 0.010  | 0.019  | -0.216    | -0.173 | -0.087 | -0.191 | -0.328 | -0.449  | -0.218    | -0.375      | -0.266     |
| 25-BF <sub>2</sub> | 0.984 | 0.936 | 0.672 | 0.470 | 0.277 | 0.232  | 0.183  | 0.132  | 0.116  | -0.212    | -0.150 | -0.081 | -0.229 | -0.463 | -0.529  | -0.255    | -0.457      | -0.330     |
| 26-BF <sub>2</sub> | 0.792 | 0.757 | 0.524 | 0.373 | 0.234 | 0.201  | 0.163  | 0.125  | 0.122  | -0.140    | -0.092 | -0.029 | -0.152 | -0.386 | -0.455  | -0.182    | -0.372      | -0.248     |
| 27-BF <sub>2</sub> | 0.780 | 0.752 | 0.549 | 0.422 | 0.296 | 0.266  | 0.234  | 0.199  | 0.196  | -0.050    | -0.011 | 0.040  | -0.082 | -0.358 | -0.410  | -0.114    | -0.313      | -0.183     |
| 28-BF <sub>2</sub> | 0.387 | 0.401 | 0.204 | 0.175 | 0.121 | 0.100  | 0.067  | 0.042  | 0.085  | -0.138    | -0.121 | -0.021 | -0.124 | -0.226 | -0.341  | -0.135    | -0.258      | -0.162     |
| 29-BF <sub>2</sub> | 0.410 | 0.383 | 0.177 | 0.131 | 0.050 | 0.026  | -0.001 | -0.030 | -0.022 | -0.237    | -0.196 | -0.117 | -0.210 | -0.320 | -0.455  | -0.241    | -0.382      | -0.281     |
| MAE                | 0.541 | 0.525 | 0.314 | 0.241 | 0.151 | 0.125  | 0.093  | 0.063  | 0.085  | -0.153    | -0.128 | -0.038 | -0.149 | -0.311 | -0.398  | -0.168    | -0.312      | -0.205     |

Figure S4: Errors (eV) determined for BF<sub>2</sub> dyes excitation energies, w.r.t CC2 benchmark. Calculations performed in gas phase. “X” under XCFs names denotes the fraction of Hartree-Fock exchange energy.

|          | SVWN  | BLYP  | M06-L | TPSSH | B3LYP | X3LYP  | APF-D | PBE0  | M06   | SOGGA11-X | BMK    | MN15   | M06-2X | M06-HF | LC-BLYP | CAM-B3LYP | oB97X       | oB97X-D    |
|----------|-------|-------|-------|-------|-------|--------|-------|-------|-------|-----------|--------|--------|--------|--------|---------|-----------|-------------|------------|
|          | X=0   | X=0   | X=0   | X=10  | X=20  | X=21.8 | X=23  | X=25  | X=27  | X=40.15   | X=42   | X=44   | X=54   | X=100  | X=0-100 | X=19-65   | X=15.77-100 | X=22.2-100 |
| 1 -HPIP  | 0.736 | 0.743 | 0.541 | 0.409 | 0.278 | 0.245  | 0.199 | 0.159 | 0.231 | -0.099    | -0.132 | -0.026 | -0.219 | -0.610 | -0.519  | -0.193    | -0.394      | -0.245     |
| 2 -HPIP  | 1.179 | 1.159 | 0.849 | 0.666 | 0.472 | 0.426  | 0.362 | 0.311 | 0.367 | -0.024    | -0.041 | 0.081  | -0.123 | -0.481 | -0.408  | -0.108    | -0.291      | -0.155     |
| 3 -HPIP  | 0.914 | 0.891 | 0.616 | 0.430 | 0.277 | 0.241  | 0.196 | 0.156 | 0.223 | -0.090    | -0.109 | -0.004 | -0.164 | -0.502 | -0.437  | -0.149    | -0.321      | -0.189     |
| 4 -HPIP  | 1.279 | 1.248 | 0.992 | 0.715 | 0.456 | 0.398  | 0.340 | 0.277 | 0.324 | -0.124    | -0.118 | -0.022 | -0.210 | -0.671 | -0.605  | -0.196    | -0.431      | -0.246     |
| 5 -HPIP  | 1.227 | 1.196 | 0.928 | 0.662 | 0.410 | 0.356  | 0.299 | 0.240 | 0.302 | -0.137    | -0.129 | -0.026 | -0.211 | -0.672 | -0.612  | -0.200    | -0.433      | -0.245     |
| 6 -HPIP  | 1.227 | 1.205 | 0.932 | 0.685 | 0.425 | 0.370  | 0.316 | 0.254 | 0.299 | -0.135    | -0.131 | -0.026 | -0.216 | -0.654 | -0.596  | -0.201    | -0.429      | -0.247     |
| 7 -HPIP  | 1.067 | 1.042 | 0.772 | 0.539 | 0.360 | 0.315  | 0.257 | 0.208 | 0.270 | -0.122    | -0.116 | -0.015 | -0.190 | -0.612 | -0.557  | -0.180    | -0.396      | -0.225     |
| 8 -HPIP  | 0.966 | 0.967 | 0.694 | 0.519 | 0.371 | 0.331  | 0.273 | 0.227 | 0.293 | -0.087    | -0.092 | 0.012  | -0.164 | -0.576 | -0.516  | -0.145    | -0.367      | -0.196     |
| 9 -HPIP  | 1.082 | 1.050 | 0.786 | 0.548 | 0.351 | 0.304  | 0.246 | 0.193 | 0.250 | -0.161    | -0.153 | -0.051 | -0.235 | -0.683 | -0.630  | -0.232    | -0.459      | -0.281     |
| 10 -HPIP | 0.967 | 0.973 | 0.712 | 0.542 | 0.388 | 0.347  | 0.286 | 0.238 | 0.302 | -0.097    | -0.108 | -0.006 | -0.189 | -0.651 | -0.600  | -0.180    | -0.435      | -0.247     |
| 11 -HPIP | 1.019 | 0.993 | 0.717 | 0.500 | 0.333 | 0.292  | 0.236 | 0.189 | 0.261 | -0.128    | -0.121 | -0.016 | -0.189 | -0.608 | -0.555  | -0.181    | -0.395      | -0.223     |
| 12 -HPIP | 1.012 | 0.996 | 0.713 | 0.512 | 0.336 | 0.293  | 0.239 | 0.191 | 0.249 | -0.132    | -0.127 | -0.019 | -0.193 | -0.583 | -0.538  | -0.183    | -0.388      | -0.225     |
| 13 -HPIP | 1.061 | 1.054 | 0.797 | 0.609 | 0.421 | 0.375  | 0.311 | 0.257 | 0.286 | -0.135    | -0.132 | -0.070 | -0.246 | -0.688 | -0.719  | -0.275    | -0.567      | -0.375     |
| 14 -HPIP | 0.990 | 0.993 | 0.730 | 0.556 | 0.395 | 0.353  | 0.290 | 0.241 | 0.304 | -0.105    | -0.113 | -0.016 | -0.201 | -0.675 | -0.625  | -0.194    | -0.458      | -0.266     |
| 15 -HPIP | 0.971 | 0.960 | 0.700 | 0.500 | 0.332 | 0.291  | 0.234 | 0.187 | 0.261 | -0.125    | -0.125 | -0.024 | -0.199 | -0.643 | -0.583  | -0.185    | -0.411      | -0.230     |
| 16 -HPIP | 1.153 | 1.134 | 0.846 | 0.613 | 0.420 | 0.372  | 0.312 | 0.259 | 0.308 | -0.092    | -0.090 | 0.012  | -0.163 | -0.557 | -0.502  | -0.148    | -0.359      | -0.198     |
| 17 -HPIP | 1.146 | 1.125 | 0.835 | 0.615 | 0.419 | 0.372  | 0.313 | 0.260 | 0.315 | -0.089    | -0.089 | 0.011  | -0.162 | -0.560 | -0.494  | -0.145    | -0.355      | -0.194     |
| 18 -HPIP | 0.965 | 0.965 | 0.685 | 0.505 | 0.347 | 0.308  | 0.254 | 0.209 | 0.269 | -0.092    | -0.097 | 0.012  | -0.158 | -0.557 | -0.494  | -0.137    | -0.346      | -0.179     |
| 19 -HPIP | 1.152 | 1.138 | 0.866 | 0.639 | 0.426 | 0.378  | 0.324 | 0.271 | 0.315 | -0.087    | -0.087 | 0.013  | -0.167 | -0.572 | -0.483  | -0.144    | -0.347      | -0.192     |
| 20 -HPIP | 1.141 | 1.122 | 0.859 | 0.633 | 0.442 | 0.396  | 0.334 | 0.281 | 0.340 | -0.079    | -0.083 | 0.014  | -0.170 | -0.597 | -0.525  | -0.153    | -0.384      | -0.213     |
| 21 -HPIP | 1.355 | 1.324 | 1.061 | 0.791 | 0.524 | 0.464  | 0.408 | 0.341 | 0.368 | -0.110    | -0.097 | -0.010 | -0.209 | -0.622 | -0.518  | -0.184    | -0.386      | -0.238     |
| 22 -HPIP | 0.824 | 0.817 | 0.592 | 0.425 | 0.268 | 0.229  | 0.176 | 0.130 | 0.182 | -0.191    | -0.200 | -0.110 | -0.297 | -0.713 | -0.657  | -0.296    | -0.515      | -0.349     |
| 23 -HPIP | 0.756 | 0.751 | 0.549 | 0.407 | 0.271 | 0.238  | 0.191 | 0.151 | 0.226 | -0.114    | -0.139 | -0.033 | -0.218 | -0.601 | -0.531  | -0.207    | -0.408      | -0.260     |
| 24 -HPIP | 0.965 | 0.947 | 0.693 | 0.490 | 0.307 | 0.264  | 0.208 | 0.159 | 0.229 | -0.170    | -0.168 | -0.063 | -0.246 | -0.703 | -0.649  | -0.240    | -0.472      | -0.288     |
| 25 -HPIP | 1.046 | 1.033 | 0.762 | 0.563 | 0.372 | 0.327  | 0.267 | 0.216 | 0.277 | -0.133    | -0.139 | -0.034 | -0.219 | -0.670 | -0.624  | -0.210    | -0.456      | -0.269     |
| 26 -HPIP | 1.097 | 1.078 | 0.801 | 0.600 | 0.407 | 0.362  | 0.300 | 0.247 | 0.304 | -0.115    | -0.110 | -0.008 | -0.197 | -0.652 | -0.603  | -0.182    | -0.434      | -0.242     |
| 27 -HPIP | 1.181 | 1.149 | 0.889 | 0.661 | 0.459 | 0.411  | 0.347 | 0.291 | 0.345 | -0.104    | -0.094 | 0.001  | -0.198 | -0.659 | -0.596  | -0.186    | -0.442      | -0.255     |
| 28 -HPIP | 0.837 | 0.823 | 0.604 | 0.436 | 0.273 | 0.236  | 0.187 | 0.144 | 0.213 | -0.144    | -0.171 | -0.066 | -0.256 | -0.645 | -0.583  | -0.249    | -0.459      | -0.307     |
| 29 -HPIP | 1.149 | 1.124 | 0.873 | 0.639 | 0.440 | 0.391  | 0.329 | 0.273 | 0.332 | -0.109    | -0.107 | -0.014 | -0.211 | -0.675 | -0.606  | -0.201    | -0.452      | -0.269     |
| 30 -HPIP | 1.062 | 1.050 | 0.783 | 0.576 | 0.386 | 0.341  | 0.280 | 0.228 | 0.291 | -0.121    | -0.123 | -0.023 | -0.210 | -0.663 | -0.608  | -0.197    | -0.443      | -0.257     |
| 31 -HPIP | 1.127 | 1.105 | 0.836 | 0.634 | 0.434 | 0.387  | 0.329 | 0.274 | 0.317 | -0.094    | -0.087 | -0.002 | -0.194 | -0.684 | -0.629  | -0.178    | -0.444      | -0.241     |
| 32 -HPIP | 1.399 | 1.368 | 1.091 | 0.838 | 0.547 | 0.487  | 0.429 | 0.363 | 0.372 | -0.070    | -0.077 | 0.012  | -0.199 | -0.705 | -0.663  | -0.211    | -0.487      | -0.286     |
| 33 -HPIP | 0.802 | 0.759 | 0.538 | 0.396 | 0.245 | 0.209  | 0.166 | 0.124 | 0.174 | -0.165    | -0.188 | -0.089 | -0.276 | -0.670 | -0.612  | -0.271    | -0.484      | -0.327     |
| 34 -HPIP | 0.859 | 0.818 | 0.597 | 0.452 | 0.295 | 0.258  | 0.213 | 0.170 | 0.231 | -0.109    | -0.141 | -0.040 | -0.234 | -0.636 | -0.550  | -0.225    | -0.437      | -0.288     |
| 35 -HPIP | 1.045 | 1.039 | 0.758 | 0.563 | 0.386 | 0.344  | 0.281 | 0.232 | 0.306 | -0.099    | -0.111 | -0.002 | -0.184 | -0.618 | -0.558  | -0.170    | -0.403      | -0.224     |
| 36 -HPIP | 1.014 | 0.995 | 0.727 | 0.538 | 0.360 | 0.319  | 0.262 | 0.214 | 0.280 | -0.120    | -0.127 | -0.020 | -0.207 | -0.664 | -0.609  | -0.204    | -0.449      | -0.263     |
| 37 -HPIP | 1.073 | 1.042 | 0.794 | 0.593 | 0.383 | 0.336  | 0.288 | 0.235 | 0.270 | -0.135    | -0.144 | -0.045 | -0.246 | -0.698 | -0.695  | -0.261    | -0.530      | -0.325     |
| 38 -HPIP | 1.060 | 1.039 | 0.772 | 0.569 | 0.377 | 0.334  | 0.278 | 0.228 | 0.286 | -0.117    | -0.124 | -0.020 | -0.207 | -0.674 | -0.623  | -0.207    | -0.456      | -0.266     |
| 39 -HPIP | 0.936 | 0.923 | 0.657 | 0.471 | 0.314 | 0.276  | 0.219 | 0.175 | 0.259 | -0.131    | -0.129 | -0.024 | -0.198 | -0.647 | -0.592  | -0.188    | -0.416      | -0.230     |
| 40 -HPIP | 1.318 | 1.287 | 1.035 | 0.812 | 0.550 | 0.494  | 0.443 | 0.379 | 0.384 | -0.056    | -0.069 | 0.012  | -0.211 | -0.682 | -0.670  | -0.227    | -0.513      | -0.305     |
| 41 -HPIP | 0.938 | 0.935 | 0.663 | 0.492 | 0.323 | 0.283  | 0.229 | 0.183 | 0.251 | -0.129    | -0.131 | -0.024 | -0.201 | -0.624 | -0.575  | -0.187    | -0.409      | -0.229     |
| 42 -HPIP | 1.063 | 1.042 | 0.784 | 0.597 | 0.396 | 0.350  | 0.300 | 0.247 | 0.287 | -0.112    | -0.121 | -0.022 | -0.210 | -0.554 | -0.531  | -0.206    | -0.424      | -0.258     |
| 43 -HPIP | 1.032 | 1.011 | 0.740 | 0.571 | 0.419 | 0.385  | 0.340 | 0.302 | 0.366 | 0.062     | 0.043  | 0.140  | -0.021 | -0.356 | -0.307  | -0.005    | -0.188      | -0.050     |
| 44 -HPIP | 0.876 | 0.878 | 0.605 | 0.457 | 0.329 | 0.295  | 0.245 | 0.205 | 0.274 | -0.063    | -0.078 | 0.026  | -0.138 | -0.300 | -0.514  | -0.119    | -0.341      | -0.154     |
| 45 -HPIP | 1.032 | 1.013 | 0.731 | 0.547 | 0.372 | 0.332  | 0.280 | 0.234 | 0.282 | -0.071    | -0.076 | 0.020  | -0.143 | -0.535 | -0.533  | -0.133    | -0.361      | -0.173     |
| 46 -HPIP | 0.558 | 0.543 | 0.339 | 0.242 | 0.141 | 0.114  | 0.082 | 0.052 | 0.097 | -0.158    | -0.149 | -0.058 | -0.168 | -0.387 | -0.368  | -0.167    | -0.289      | -0.200     |
| 47 -HPIP | 0.724 | 0.695 | 0.477 | 0.335 | 0.187 | 0.155  | 0.126 | 0.090 | 0.127 | -0.140    | -0.133 | -0.042 | -0.161 | -0.394 | -0.365  | -0.152    | -0.277      | -0.182     |
| 48 -HPIP | 0.717 | 0.681 | 0.470 | 0.325 | 0.190 | 0.159  | 0.126 | 0.090 | 0.133 | -0.141    | -0.132 | -0.043 | -0.161 | -0.389 | -0.364  | -0.155    | -0.281      | -0.188     |
| 49 -HPIP | 0.621 | 0.599 | 0.378 | 0.263 | 0.148 | 0.120  | 0.088 | 0.056 | 0.106 | -0.149    | -0.144 | -0.051 | -0.162 | -0.374 | -0.355  | -0.154    | -0.273      | -0.182     |
| 50 -HPIP | 1.153 | 1.131 | 0.846 | 0.599 | 0.393 | 0.350  | 0.301 | 0.252 | 0.304 | -0.067    | -0.078 | 0.037  | -0.145 | -0.571 | -0.514  | -0.117    | -0.340      | -0.157     |
| 51 -HPIP | 1.054 | 1.048 | 0.770 | 0.573 | 0.395 | 0.352  | 0.291 | 0.242 | 0.306 | -0.088    | -0.097 | 0.006  | -0.172 | -0.602 | -0.545  | -0.153    | -0.386      | -0.206     |
| 52 -HPIP | 1.144 | 1.125 | 0.846 | 0.658 | 0.462 | 0.415  | 0.356 | 0.303 | 0.336 | -0.067    | -0.058 | 0.020  | -0.144 | -0.525 | -0.524  | -0.148    | -0.377      | -0.203     |
| 53 -HPIP | 1.008 | 0.962 | 0.672 | 0.470 | 0.284 | 0.246  | 0.199 | 0.158 | 0.216 | -0.106    | -0.119 | -0.019 | -0.175 | -0.507 | -0.475  | -0.168    | -0.349      | -0.207     |
| 54 -HPIP | 1.054 | 1.021 | 0.779 | 0.566 | 0.370 | 0.327  | 0.281 | 0.232 | 0.282 | -0.068    | -0.100 | 0.002  | -0.185 | -0.561 | -0.476  | -0.169    | -0.356      | -0.213     |
| 55 -HPIP | 0.871 | 0.854 | 0.676 | 0.542 | 0.419 | 0.389  | 0.358 | 0.324 | 0.355 | 0.093     | 0.080  | 0.142  | -0.010 | -0.441 | -0.407  | -0.019    | -0.241      | -0.060     |
| 56 -HPIP | 1.198 | 1.148 | 0.843 | 0.639 | 0.428 | 0.383  | 0.325 | 0.275 | 0.338 | -0.057    | -0.063 | 0.053  | -0.128 | -0.428 | -0.426  | -0.120    | -0.297      | -0.153     |
| MAE      | 1.021 | 1.002 | 0.743 | 0.549 | 0.366 | 0.324  | 0.271 | 0.222 | 0.276 | -0.104    | -0.109 | -0.010 | -0.188 | -0.589 | -0.544  | -0.179    | -0.397      | -0.230     |

Figure S5: Errors (eV) established for HPIP excitation energies, w.r.t CC2 benchmark. Calculations performed in gas phase. “X” under XCFs names denotes the fraction of Hartree-Fock exchange energy.

## S4 XCFs accuracy - dipole moments

|                      | SVWN  |       | BLYP  |       | M06-L |       | TPSSH |       | B3LYP |       | X3LYP  |       | APF-D |       | PBE0  |       | M06   |       | SOGGA11-X |       | BMK  |       | MN15 |       | M06-2X |       | M06-HF |       | LC-BLYP |       | CAM-B3LYP |       | oB97X      |       | oB97X-D    |       |
|----------------------|-------|-------|-------|-------|-------|-------|-------|-------|-------|-------|--------|-------|-------|-------|-------|-------|-------|-------|-----------|-------|------|-------|------|-------|--------|-------|--------|-------|---------|-------|-----------|-------|------------|-------|------------|-------|
|                      | X=0   |       | X=0   |       | X=0   |       | X=10  |       | X=20  |       | X=21.8 |       | X=23  |       | X=25  |       | X=27  |       | X=40.15   |       | X=42 |       | X=44 |       | X=54   |       | X=100  |       | X=0-100 |       | X=19-65   |       | X=15,7-100 |       | X=22.2-100 |       |
|                      | GS    | ES    | GS     | ES    | GS    | ES    | GS    | ES    | GS    | ES    | GS        | ES    | GS   | ES    | GS   | ES    | GS     | ES    | GS     | ES    | GS      | ES    | GS        | ES    | GS         | ES    | GS         | ES    |
| 1 - BF <sub>2</sub>  | -6.4  | -12.5 | -4.1  | -11.5 | -4.6  | -11.6 | -3.3  | -2.4  | -2.1  | 3.5   | -2.0   | 4.7   | -2.5  | 5.3   | -2.4  | 6.5   | -1.2  | 9.6   | -2.1      | 16.5  | -0.8 | 15.0  | 1.0  | 19.0  | 1.7    | 20.5  | 2.7    | 38.1  | 1.6     | 36.1  | 0.9       | 24.4  | 2.2        | 34.2  | 1.5        | 29.0  |
| 2 - BF <sub>2</sub>  | 1.3   | 25.7  | 2.1   | 23.2  | 2.9   | 9.6   | -1.3  | -2.8  | -2.4  | -7.5  | -2.7   | -8.6  | -2.4  | -8.8  | -2.6  | -9.6  | -1.7  | -12.8 | -5.1      | -15.9 | -5.9 | -15.1 | -4.0 | -13.1 | -4.8   | -13.3 | -13.5  | -22.7 | -8.1    | -20.6 | -4.8      | -15.5 | -4.3       | -15.9 | -4.0       | -14.8 |
| 3 - BF <sub>2</sub>  | 1.7   | 23.7  | 1.6   | 25.3  | 2.9   | 21.7  | -1.0  | 10.8  | -3.4  | 2.5   | -3.9   | 0.9   | -2.9  | 1.4   | -3.2  | 0.0   | -3.4  | -2.6  | -5.8      | -8.8  | -6.5 | -10.5 | -4.7 | -9.0  | -5.0   | -11.7 | -12.0  | -28.7 | -10.1   | -26.5 | -6.4      | -14.2 | -5.7       | -17.9 | -4.8       | -13.3 |
| 4 - BF <sub>2</sub>  | 2.9   | 23.3  | 3.7   | 21.5  | 4.7   | 11.6  | 0.6   | -0.7  | -0.9  | -6.1  | -1.3   | -7.5  | -0.8  | -7.9  | -1.1  | -9.0  | -0.4  | -14.4 | -3.3      | -17.3 | -4.4 | -15.9 | -2.4 | -13.8 | -3.3   | -13.9 | -12.0  | -22.4 | -6.8    | -23.7 | -3.6      | -17.9 | -3.0       | -18.7 | -2.6       | -17.6 |
| 5 - BF <sub>2</sub>  | 1.4   | -29.9 | 2.9   | -30.1 | 4.5   | -34.3 | 1.0   | -28.4 | -0.8  | -25.9 | -1.2   | -25.8 | -0.2  | -23.4 | -0.4  | -22.9 | -0.8  | -30.1 | -1.9      | -21.7 | -3.7 | -20.7 | -1.5 | -17.5 | -2.2   | -13.3 | -10.5  | -11.7 | -4.9    | -14.0 | -2.3      | -16.6 | -0.6       | -10.7 | -0.6       | -12.8 |
| 6 - BF <sub>2</sub>  | -0.5  | 16.0  | 0.7   | 20.3  | 0.7   | 16.8  | -1.6  | 10.2  | -4.0  | 3.1   | -4.4   | 1.9   | -3.9  | 1.7   | -4.2  | 0.6   | -4.8  | -0.8  | -6.7      | -6.8  | -7.3 | -9.1  | -5.1 | -7.0  | -5.5   | -10.0 | -11.2  | -25.1 | -10.3   | -23.1 | -6.7      | -11.3 | -6.2       | -15.0 | -5.5       | -10.7 |
| 7 - BF <sub>2</sub>  | -7.5  | -41.6 | -4.7  | -38.0 | -4.9  | -39.1 | -4.6  | -21.0 | -4.9  | -5.5  | -5.0   | -3.0  | -5.2  | -3.1  | -5.2  | -0.6  | -5.0  | 7.6   | -5.8      | 14.1  | -6.1 | 10.6  | -3.4 | 16.6  | -3.5   | 17.1  | -5.0   | 20.7  | -5.3    | 25.1  | -4.1      | 21.6  | -3.0       | 26.9  | -3.3       | 25.5  |
| 8 - BF <sub>2</sub>  | -3.3  | -53.4 | -2.6  | -42.6 | -3.5  | -36.0 | -4.2  | -11.2 | -6.2  | 0.8   | -6.5   | 2.2   | -6.1  | 1.7   | -6.4  | 2.8   | -7.4  | 7.9   | -8.8      | 6.8   | -8.4 | 3.6   | -6.8 | 6.0   | -6.6   | 4.1   | -10.0  | -3.5  | -10.4   | -1.2  | -7.9      | 6.1   | -7.4       | 4.3   | -7.0       | 7.5   |
| 9 - BF <sub>2</sub>  | 0.7   | 22.4  | 1.6   | 22.0  | 2.1   | 14.2  | -0.6  | 6.6   | -3.1  | -1.2  | -3.5   | -2.5  | -2.8  | -2.3  | -3.1  | -3.4  | -3.4  | -7.1  | -5.5      | -11.4 | -6.3 | -12.4 | -4.1 | -10.3 | -4.6   | -12.4 | -10.8  | -26.7 | -9.2    | -25.8 | -5.7      | -15.3 | -5.1       | -18.2 | -4.5       | -14.5 |
| 10 - BF <sub>2</sub> | -1.0  | -60.9 | 0.2   | -53.1 | 0.1   | -51.4 | -0.8  | -32.0 | -2.6  | -19.5 | -2.9   | -17.3 | -2.3  | -16.9 | -2.4  | -14.7 | -3.8  | -8.3  | -3.9      | -12   | -4.7 | -3.1  | -2.7 | 1.8   | -3.0   | 3.2   | -6.9   | 7.6   | -5.4    | 13.2  | -3.6      | 5.7   | -2.4       | 12.0  | -2.6       | 7.0   |
| 11 - BF <sub>2</sub> | -4.1  | -58.7 | -2.2  | -55.5 | -2.6  | -56.3 | -2.5  | -36.8 | -2.9  | -19.8 | -3.0   | -16.5 | -3.0  | -15.6 | -3.1  | -12.3 | -3.2  | -4.9  | -3.8      | 3.3   | -4.3 | 1.4   | -1.7 | 5.6   | -2.3   | 7.6   | -4.2   | 9.4   | -2.6    | 13.5  | -2.2      | 10.2  | -1.1       | 14.0  | -1.7       | 11.9  |
| 12 - BF <sub>2</sub> | -8.8  | -43.7 | -6.3  | -41.6 | -6.6  | -41.8 | -6.0  | -21.9 | -5.6  | -4.9  | -5.6   | -1.9  | -5.8  | -0.7  | -5.7  | 1.9   | -5.7  | 7.1   | -5.6      | 12.9  | -5.9 | 10.5  | -3.0 | 13.7  | -2.9   | 13.3  | -2.4   | 11.8  | -1.6    | 16.8  | -3.1      | 16.5  | -1.1       | 18.4  | -2.6       | 18.2  |
| 13 - BF <sub>2</sub> | 0.8   | -29.3 | 2.1   | -29.6 | 2.7   | -33.1 | 1.0   | -21.6 | -0.3  | -16.3 | -0.6   | -15.5 | -0.3  | -14.9 | -0.4  | -14.1 | 0.5   | -12.6 | -1.6      | -10.9 | -2.8 | -10.0 | -0.1 | -6.6  | -1.3   | -4.7  | -6.4   | -3.9  | -3.8    | -5.2  | -1.7      | -5.8  | -1.0       | -3.2  | -0.9       | -4.3  |
| 14 - BF <sub>2</sub> | -4.8  | -25.0 | -2.8  | -17.3 | -3.0  | -13.2 | -3.0  | -0.7  | -3.5  | 7.0   | -3.6   | 8.3   | -3.7  | 7.5   | -3.7  | 8.6   | -3.1  | 15.7  | -4.4      | 14.9  | -4.8 | 10.1  | -2.0 | 14.7  | -2.5   | 13.2  | -4.6   | 13.0  | -3.8    | 15.5  | -3.0      | 15.6  | -1.8       | 17.6  | -2.3       | 17.2  |
| 15 - BF <sub>2</sub> | 4.0   | 8.3   | 5.5   | 9.8   | 6.7   | -0.1  | 4.8   | -5.4  | 2.0   | -10.9 | 1.6    | -12.2 | 2.6   | -11.7 | 2.3   | -12.6 | 1.7   | -20.5 | 1.4       | -19.2 | -0.2 | -17.5 | 1.7  | -15.6 | 1.3    | -13.9 | -3.9   | -18.4 | -2.0    | -24.9 | 0.4       | -19.1 | 1.7        | -18.8 | 1.8        | -17.3 |
| 16 - BF <sub>2</sub> | 0.7   | 5.4   | 2.5   | 8.6   | 2.5   | 7.3   | 0.9   | 4.7   | -1.3  | 0.2   | -1.7   | -0.6  | -1.2  | -0.6  | -1.5  | -1.3  | -2.4  | -4.2  | -3.3      | -6.6  | -4.3 | -7.4  | -2.1 | -5.7  | -2.5   | -6.5  | -8.1   | -16.4 | -6.1    | -15.3 | -3.3      | -8.3  | -2.5       | -9.6  | -2.3       | -7.6  |
| 17 - BF <sub>2</sub> | 4.1   | 4.1   | 5.2   | 8.9   | 6.2   | 10.2  | 2.4   | 2.4   | 0.9   | -3.7  | 0.5    | -5.1  | 1.0   | -5.5  | 0.7   | -6.7  | 1.1   | -11.9 | -1.1      | -15.7 | -2.4 | -14.6 | -0.6 | -13.0 | -1.4   | -13.1 | -9.7   | -23.7 | -4.4    | -24.1 | -1.5      | -17.0 | -0.9       | -18.6 | -0.7       | -16.9 |
| 18 - BF <sub>2</sub> | 2.7   | -22.2 | 4.3   | -21.4 | 5.7   | -26.0 | 2.5   | -24.5 | 0.6   | -23.3 | 0.2    | -23.7 | 1.1   | -22.1 | 0.9   | -22.1 | 0.4   | -28.9 | -0.5      | -24.1 | -2.4 | -23.1 | -0.4 | -20.1 | -1.0   | -17.1 | -8.9   | -20.5 | -3.5    | -21.7 | -1.1      | -20.5 | 0.4        | -16.9 | 0.4        | -17.6 |
| 19 - BF <sub>2</sub> | 1.2   | -4.5  | 2.6   | 0.7   | 3.1   | 1.6   | 0.7   | 3.1   | -1.4  | 0.1   | -1.7   | -0.5  | -1.1  | -0.1  | -1.4  | -0.5  | -2.1  | -2.3  | -3.1      | -4.2  | -4.2 | -5.6  | -2.3 | -4.1  | -2.5   | -4.7  | -8.5   | -14.4 | -6.2    | -12.6 | -3.4      | -5.9  | -2.5       | -6.9  | -2.2       | -4.9  |
| 20 - BF <sub>2</sub> | 0.3   | -34.9 | 1.9   | -29.2 | 2.3   | -24.3 | 0.1   | -8.7  | -1.7  | -1.8  | -2.1   | -1.0  | -1.5  | -0.6  | -1.7  | 0.2   | -2.5  | 1.6   | -3.4      | 2.5   | -4.5 | 0.5   | -2.3 | 2.5   | -2.7   | 2.7   | -9.0   | -3.3  | -6.8    | -1.5  | -3.7      | 2.5   | -2.8       | 3.0   | -2.5       | 4.0   |
| 21 - BF <sub>2</sub> | 2.1   | 11.2  | 3.3   | 12.5  | 4.1   | 10.5  | 1.5   | 4.8   | -0.7  | -0.5  | -1.1   | -1.5  | -0.4  | -1.2  | -0.6  | -2.1  | -1.1  | -5.5  | -2.3      | -8.3  | -3.4 | -8.8  | -1.5 | -7.5  | -1.9   | -8.0  | -8.2   | -19.0 | -5.5    | -18.0 | -2.7      | -10.5 | -1.8       | -11.9 | -1.5       | -9.6  |
| 22 - BF <sub>2</sub> | -5.9  | -39.6 | -3.3  | -36.9 | -3.0  | -10.5 | -3.2  | -21.6 | -3.6  | -7.2  | -3.7   | -4.8  | -3.7  | -4.3  | -3.7  | -1.7  | -3.9  | 5.7   | -3.8      | 13.7  | -4.5 | 10.5  | -2.1 | 15.7  | -2.1   | 17.3  | -4.8   | 22.3  | -3.6    | 26.8  | -2.6      | 21.4  | -1.2       | 27.8  | -1.7       | 25.4  |
| 23 - BF <sub>2</sub> | 0.3   | -50.1 | 0.8   | -53.5 | 1.0   | -61.4 | -0.3  | -38.8 | -2.1  | -28.0 | -2.4   | -26.6 | -1.9  | -25.4 | -2.2  | -24.0 | -2.2  | -24.2 | -3.7      | -17.1 | -4.2 | -12.8 | -2.2 | -9.6  | -2.5   | -5.7  | -6.1   | -1.9  | -5.2    | -4.6  | -3.4      | -7.2  | -2.7       | -3.1  | -2.6       | -5.1  |
| 24 - BF <sub>2</sub> | -10.4 | -19.9 | -8.1  | -14.4 | 29.3  | -11.4 | -7.3  | 2.3   | -7.0  | 10.8  | -7.0   | 12.2  | -7.4  | 11.6  | -7.3  | 12.9  | -6.5  | 19.7  | -7.3      | 21.0  | -6.6 | 15.9  | -3.8 | 21.0  | -3.6   | 19.1  | -2.0   | 21.0  | -2.6    | 24.2  | -4.0      | 22.4  | -2.1       | 25.7  | -3.4       | 24.4  |
| 25 - BF <sub>2</sub> | -9.4  | -46.1 | -6.8  | -45.5 | -6.4  | -47.7 | -5.3  | -33.4 | -4.9  | -19.7 | -4.8   | -16.9 | -4.9  | -15.2 | -4.7  | -12.1 | -4.8  | -6.7  | -4.1      | 8.9   | -4.2 | 7.1   | -1.6 | 12.5  | -1.6   | 16.0  | -2.0   | 29.9  | -0.7    | 34.2  | -1.7      | 21.2  | 0.7        | 32.5  | -0.7       | 26.9  |
| 26 - BF <sub>2</sub> | -14.9 | -41.5 | -12.0 | -40.2 | -11.3 | -37.8 | -9.6  | -16.8 | -8.5  | -2.2  | -8.4   | 0.3   | -8.3  | 1.3   | -8.0  | 3.6   | -8.2  | 9.2   | -6.8      | 16.9  | -6.4 | 13.9  | -3.6 | 17.8  | -2.6   | 18.3  | -0.2   | 25.4  | -0.1    | 28.7  | -3.0      | 22.4  | 0.4        | 28.7  | -1.8       | 26.3  |
| 27 - BF <sub>2</sub> | -19.5 | -25.5 | -16.3 | -24.7 | -15.3 | -20.7 | -13.2 | -5.4  | -11.5 | 4.7   | -11.2  | 6.4   | -11.1 | 7.0   | -10.7 | 8.6   | -10.7 | 14.0  | -8.7      | 19.1  | -8.0 | 16.1  | -5.1 | 19.6  | -3.3   | 19.8  | 1.1    | 27.6  | 0.5     | 30.5  | -4.0      | 24.1  | 0.4        | 30.4  | -2.4       | 28.2  |
| 28 - BF <sub>2</sub> | -0.7  | -38.1 | -0.1  | -40.6 | 2.8   | -42.3 | 0.5   | -26.5 | -3.3  | -22.1 | -3.7   | -21.4 | -2.1  | -18.9 | -2.3  | -18.0 | -3.6  | -20.4 | -3.5      | -13.8 | -4.4 | -11.9 | -1.6 | -8.5  | -3.8   | -7.7  | -8.2   | -8.3  | -6.9    | -9.4  | -4.8      | -9.7  | -2.2       | -5.1  | -2.3       | -6.4  |
| 29 - BF <sub>2</sub> | -11.3 | -16.8 | -9.0  | -11.8 | 30.3  | -11.6 | -7.5  | 0.8   | -7.8  | 9.8   | -7.7   | 11.2  | -7.6  | 10.4  | -7.5  | 11.8  | -7.1  | 18.8  | -7.2      | 20.5  | -6.8 | 16.0  | -4.0 | 21.1  | -4.2   | 19.5  | -2.9   | 21.8  | -4.1    | 25.0  | -4.9      | 23.0  | -2.2       | 26.9  | -3.4       | 25.6  |
| MIN                  | -19.5 | -60.9 | -16.3 | -55.5 | -15.3 | -61.4 | -13.2 | -38.8 | -11.5 | -28.0 | -11.2  | -26.6 | -11.1 | -25.4 | -10.7 | -24.0 | -10.7 | -30.1 | -8.8      | -24.1 | -8.4 | -23.1 | -6.8 | -20.1 | -6.6   | -17.1 | -13.5  | -28.7 | -10.4   | -26.5 | -7.9      | -20.5 | -7.4       | -18.8 | -7.0       | -17.6 |
| MAE                  | -2.9  | -19.1 | -1.3  | -16.7 | 1.8   | -17.5 | -2.0  | -10.9 | -3.2  | -6.3  | -3.4   | -5.7  | -3.0  | -5.2  | -3.2  | -4.5  | -3.3  | -3.5  | -4.2      | -1.1  | -4.8 | -2.3  | -2.5 | 0.9   | -2.8   | 1.2   | -6.5   | -0.8  | -4.8    | 0.6   | -3.4      | 1.5   | -2.0       | 3.9   | -2.3       | 3.6   |
| MAX                  | 4.1   | 25.7  | 5.5   | 25.3  | 30.3  | 21.7  | 4.8   | 10.8  | 2.0   | 10.8  | 1.6    | 12.2  | 2.6   | 11.6  | 2.3   | 12.9  | 1.7   | 19.7  | 1.4       | 21.0  | -0.2 | 16.1  | 1.7  | 21.1  | 1.7    | 20.5  | 2.7    | 38.1  | 1.6     | 36.1  | 0.9       | 24.4  | 2.2        | 34.2  | 1.8        | 29.0  |

Figure S6: Percentage signed errors established for difluoroborane dipole moments, w.r.t CC2 benchmark. Calculations performed in the gas phase. “X” under XCFs names denotes the fraction of Hartree-Fock exchange energy.

|          | SVWN  |        | BLYP  |        | M06L  |        | TPSSH |        | B3LYP |        | X3LYP |        | APF-D |        | PBE0  |        | M06  |        | SOGGA11-X |       | BMK   |       | MN15 |       | M06-2X |       | M06-HF |        | LC-BLYP |        | CAM-B3LYP |       | wB97X |       | wB97X-D |        |      |      |
|----------|-------|--------|-------|--------|-------|--------|-------|--------|-------|--------|-------|--------|-------|--------|-------|--------|------|--------|-----------|-------|-------|-------|------|-------|--------|-------|--------|--------|---------|--------|-----------|-------|-------|-------|---------|--------|------|------|
|          | GS    | ES     | GS   | ES     | GS        | ES    | GS    | ES    | GS   | ES    | GS     | ES    | GS     | ES     | GS      | ES     | GS        | ES    | GS    | ES    |         |        |      |      |
| 1 -HPIP  | 0.1   | -41.6  | -3.4  | -50.5  | 6.3   | -52.0  | 2.9   | -43.6  | 1.5   | -39.4  | 1.3   | -38.1  | 1.9   | -33.2  | 1.9   | -31.4  | 2.6  | -32.2  | 2.2       | -22.4 | -1.3  | -19.1 | 2.3  | -14.1 | 1.4    | -3.7  | -5.9   | 12.5   | -4.0    | 7.6    | -0.5      | -4.6  | 0.7   | 4.5   | 0.5     | 10.2   |      |      |
| 2 -HPIP  | 1.5   | -64.7  | -4.7  | -75.8  | 8.1   | -53.3  | 2.9   | -34.7  | 2.1   | 7.8    | 1.8   | 18.6   | 1.7   | 33.3   | 1.6   | 45.4   | 4.5  | 57.4   | 1.7       | 60.7  | -0.6  | 63.9  | 1.8  | 58.8  | -0.2   | 34.4  | -9.7   | -30.5  | -3.3    | -26.5  | -0.3      | 10.8  | 0.5   | -1.0  | 0.2     | -15.9  |      |      |
| 3 -HPIP  | 2.0   | 19.0   | -5.0  | -51.8  | 8.7   | 17.9   | 2.8   | 3.1    | 1.7   | 0.7    | 1.3   | 0.0    | 1.3   | -3.8   | 1.1   | -2.6   | 3.9  | 9.0    | 0.8       | 8.8   | -1.4  | 6.6   | 1.0  | 11.9  | -1.1   | 7.8   | -12.1  | 2.1    | -5.5    | 11.6   | -1.5      | 11.7  | -0.7  | 12.8  | -1.3    | 14.1   |      |      |
| 4 -HPIP  | 4.8   | -137.6 | -6.1  | -138.7 | 8.9   | -141.5 | 1.0   | -125.9 | -2.4  | -95.8  | -3.1  | -87.2  | -2.4  | -82.0  | -2.9  | -71.7  | -0.8 | -57.2  | -5.8      | -0.8  | -8.8  | -3.1  | -6.4 | 4.0   | -8.8   | 13.5  | -24.1  | 20.8   | -17.8   | 27.5   | -9.7      | 16.7  | -8.1  | 23.0  | -10.4   | 27.3   |      |      |
| 5 -HPIP  | 3.0   | -171.9 | -4.9  | -174.5 | 6.2   | -174.6 | 0.5   | -151.9 | -2.9  | -101.2 | -3.6  | -88.7  | -3.2  | -82.0  | -3.6  | -67.8  | -2.1 | -49.5  | -6.4      | 7.2   | -9.1  | 5.0   | -6.8 | 10.2  | -8.8   | 16.8  | -21.2  | 17.7   | -17.6   | 26.7   | -9.9      | 19.4  | -8.6  | 23.7  | -10.9   | 27.7   |      |      |
| 6 -HPIP  | 6.4   | -153.9 | -6.3  | -155.0 | 10.3  | -156.6 | 0.8   | -136.0 | -2.4  | -96.7  | -3.1  | -87.0  | -2.1  | -80.9  | -2.6  | -69.5  | 0.4  | -54.4  | -5.3      | 2.3   | -8.0  | 0.4   | -6.5 | 6.2   | -8.8   | 17.3  | -25.2  | 31.0   | -18.0   | 40.3   | -9.8      | 21.6  | -7.9  | 29.1  | -10.4   | 37.1   |      |      |
| 7 -HPIP  | 2.0   | -245.5 | -3.8  | -247.5 | 4.5   | -235.9 | 0.6   | -166.8 | -0.2  | -94.0  | -0.4  | -78.6  | -0.7  | -63.4  | -1.0  | -48.0  | 0.2  | -32.8  | -2.6      | -2.7  | -4.0  | -3.9  | -2.6 | 0.9   | -4.0   | -7.4  | -11.6  | -69.0  | -8.6    | -60.1  | -4.2      | -14.1 | -4.1  | -25.8 | -5.4    | -38.8  |      |      |
| 8 -HPIP  | 3.1   | -117.2 | -4.4  | -122.6 | 5.2   | -112.1 | 0.4   | -68.9  | -0.1  | -37.7  | -0.4  | -32.0  | -0.7  | -22.0  | -1.0  | -16.6  | 0.6  | -13.6  | -3.1      | -7.0  | -4.3  | -7.9  | -3.1 | -4.9  | -4.5   | -11.4 | -13.7  | -82.9  | -8.9    | -76.6  | -4.5      | -17.2 | -4.6  | -28.8 | -5.7    | -46.7  |      |      |
| 9 -HPIP  | 3.5   | -197.5 | -5.8  | -199.1 | 6.9   | -195.9 | 4.8   | -160.9 | 2.0   | -111.8 | 1.6   | -100.4 | 1.9   | -90.3  | 1.6   | -77.2  | 1.6  | -60.2  | 0.8       | 5.2   | -1.8  | 3.2   | 0.4  | 9.0   | -1.6   | 27.1  | -6.2   | 49.0   | -8.6    | 47.9   | -3.2      | 34.0  | -2.5  | 44.2  | -4.6    | 49.8   |      |      |
| 10 -HPIP | 9.1   | -58.4  | -9.9  | -62.0  | 12.9  | -62.9  | 5.0   | -48.5  | 1.2   | -32.0  | 0.4   | -28.8  | 1.6   | -24.4  | 1.1   | -20.6  | 1.4  | -17.4  | -2.9      | 9.1   | -5.9  | 12.8  | -3.6 | 16.1  | -6.0   | 25.7  | -21.7  | 56.2   | -16.5   | 58.5   | -7.7      | 32.4  | -6.4  | 45.5  | -9.3    | 54.7   |      |      |
| 11 -HPIP | -0.3  | -222.5 | -2.4  | -226.9 | 1.7   | -201.8 | -0.2  | -118.9 | -1.2  | -34.6  | -1.4  | -21.0  | -1.9  | -8.5   | -2.1  | 1.5    | -1.3 | 7.6    | -3.7      | -16.6 | -5.0  | -15.7 | -3.2 | -13.3 | -4.4   | -29.6 | -10.0  | -106.6 | -8.8    | -103.5 | -4.8      | -38.9 | -4.8  | -54.3 | -5.7    | -74.2  |      |      |
| 12 -HPIP | 1.6   | -301.3 | -3.0  | -304.5 | 3.7   | -281.2 | 0.0   | -187.4 | -0.5  | -92.4  | -0.7  | -74.4  | -1.0  | -56.9  | -1.2  | -40.1  | 0.4  | -23.6  | -2.5      | -11.3 | -3.7  | -10.7 | -2.4 | -8.6  | -3.8   | -23.7 | -11.1  | -113.6 | -7.7    | -107.8 | -4.0      | -34.3 | -3.9  | -51.0 | -4.8    | -75.6  |      |      |
| 13 -HPIP | 4.4   | -18.3  | -6.2  | -18.8  | 10.6  | -20.7  | 2.8   | -17.1  | -0.3  | -10.9  | -1.0  | -9.6   | 0.0   | -8.2   | -0.4  | -6.4   | 2.1  | -2.1   | -3.5      | 9.6   | -6.1  | 9.3   | -4.1 | 16.0  | -5.9   | 21.4  | -21.6  | 68.4   | -17.5   | 59.2   | -8.2      | 28.4  | -6.5  | 40.7  | -9.5    | 51.4   |      |      |
| 14 -HPIP | 9.2   | -44.0  | -9.8  | -46.4  | 12.5  | -47.6  | 4.1   | -37.2  | -0.2  | -24.7  | -1.1  | -22.2  | -0.2  | -18.4  | -0.8  | -15.2  | 0.6  | -13.1  | -4.5      | 10.2  | -7.0  | 12.2  | -6.1 | 16.5  | -8.6   | 24.9  | -23.9  | 60.1   | -19.3   | 61.4   | -10.0     | 31.1  | -8.9  | 44.4  | -12.2   | 54.2   |      |      |
| 15 -HPIP | 3.4   | -88.4  | -5.3  | -90.4  | 7.0   | -88.5  | 2.7   | -60.5  | 0.9   | -28.8  | 0.5   | -23.7  | 0.6   | -18.9  | 0.3   | -13.8  | 1.9  | -8.7   | -1.3      | 3.9   | -3.4  | 3.2   | -1.2 | 6.7   | -3.1   | 7.4   | -11.9  | 0.4    | -9.0    | 5.4    | -3.8      | 7.1   | -3.2  | 7.7   | -4.7    | 8.3    |      |      |
| 16 -HPIP | 2.6   | -509.8 | -4.2  | -518.5 | 4.6   | -501.6 | 1.1   | -397.9 | 0.3   | -280.4 | -0.1  | -251.8 | -0.2  | -217.5 | -0.5  | -185.0 | 0.4  | -156.5 | -2.2      | -14.3 | -3.4  | -16.7 | -2.5 | -5.4  | -3.6   | -12.7 | -10.6  | -180.1 | -8.4    | -171.3 | -4.0      | -27.6 | -3.9  | -56.2 | -5.3    | -110.1 |      |      |
| 17 -HPIP | 2.9   | -498.9 | -4.4  | -507.8 | 3.9   | -486.4 | 1.5   | -398.4 | 0.3   | -276.9 | 0.0   | -248.9 | -0.1  | -216.7 | -0.3  | -184.7 | 0.1  | -160.7 | -1.9      | -16.5 | -4.0  | -10.4 | -2.5 | -2.8  | -3.2   | -14.0 | -9.0   | -182.1 | -8.6    | -185.9 | -4.1      | -30.1 | -4.0  | -61.2 | -5.5    | -120.2 |      |      |
| 18 -HPIP | -2.1  | -115.2 | 0.6   | -124.4 | -1.0  | -101.1 | -1.6  | -17.5  | -2.3  | 61.2   | -2.5  | 65.8   | -2.5  | 62.8   | -2.6  | 54.5   | -3.1 | 38.1   | -3.6      | -24.2 | -4.8  | -28.7 | -2.9 | -24.3 | -2.9   | -42.7 | -5.2   | -133.7 | -6.7    | -153.2 | -4.4      | -56.8 | -4.4  | -78.0 | -4.9    | -109.9 |      |      |
| 19 -HPIP | 3.3   | -408.4 | -4.9  | -422.0 | 5.8   | -419.2 | 2.1   | -350.8 | 0.0   | -244.7 | -0.4  | -221.4 | -0.1  | -200.2 | -0.4  | -173.7 | -0.1 | -143.9 | -2.3      | -17.4 | -4.0  | -12.1 | -2.6 | -3.5  | -3.8   | -0.6  | -11.4  | -153.8 | -10.2   | -160.1 | -5.0      | -13.2 | -4.2  | -38.3 | -5.9    | -94.3  |      |      |
| 20 -HPIP | 4.1   | -115.0 | -5.7  | -115.9 | 7.4   | -117.4 | 2.9   | -97.3  | 0.9   | -72.3  | 0.4   | -66.4  | 0.7   | -59.4  | 0.4   | -52.2  | 1.7  | -47.8  | -1.5      | -4.5  | -3.4  | -3.7  | -1.5 | 3.4   | -3.2   | 14.9  | -12.1  | 23.9   | -9.8    | 25.6   | -4.3      | 19.0  | -3.6  | 27.0  | -5.4    | 31.7   |      |      |
| 21 -HPIP | 3.8   | -196.3 | -5.5  | -198.4 | 7.0   | -200.7 | 2.7   | -168.0 | 0.7   | -164.7 | 0.2   | -158.0 | 0.5   | -149.0 | 0.1   | -139.4 | 1.5  | -132.4 | -1.9      | -46.0 | -3.2  | -45.0 | -2.1 | -30.0 | -3.6   | 2.3   | -11.5  | 38.8   | -10.0   | 41.1   | -4.6      | 14.8  | -4.1  | 31.3  | -6.1    | 42.7   |      |      |
| 22 -HPIP | -0.6  | -30.8  | -4.3  | -33.8  | 5.5   | -44.6  | 2.6   | -33.2  | 1.3   | -26.2  | 1.0   | -24.6  | 0.6   | -22.9  | 0.4   | -20.9  | 2.4  | -18.6  | -0.1      | -7.4  | -2.4  | -3.6  | 1.1  | 3.8   | -1.1   | 10.0  | -9.7   | 20.2   | -5.0    | 27.7   | -1.3      | 18.0  | -0.7  | 23.8  | -1.0    | 29.3   |      |      |
| 23 -HPIP | 0.7   | -39.9  | -3.7  | -46.3  | 8.0   | -91.9  | 0.9   | -70.7  | -1.3  | -58.7  | -1.6  | -56.1  | -1.6  | -47.4  | -1.8  | -43.7  | -0.2 | -43.1  | -3.9      | -22.5 | -6.4  | -13.7 | -0.7 | -9.6  | -4.1   | 4.6   | -16.0  | -9.9   | -11.5   | -0.9   | -5.7      | 4.2   | -4.9  | 9.3   | -5.4    | 7.7    |      |      |
| 24 -HPIP | 5.2   | -83.1  | -7.9  | -84.8  | 10.9  | -83.5  | 7.3   | -68.3  | 3.4   | -40.6  | 2.9   | -35.6  | 3.8   | -31.8  | 3.4   | -26.3  | 4.2  | -18.8  | 2.6       | 4.6   | -1.0  | 4.6   | 2.4  | 7.0   | -0.1   | 13.9  | -8.1   | 24.5   | -8.5    | 29.8   | -2.1      | 18.1  | -0.6  | 24.3  | -2.8    | 28.3   |      |      |
| 25 -HPIP | 6.3   | -84.5  | -8.4  | -87.0  | 11.4  | -86.8  | 8.5   | -72.9  | 3.6   | -47.9  | 3.0   | -43.1  | 4.3   | -38.3  | 3.9   | -32.7  | 4.4  | -27.0  | 3.0       | 3.8   | -0.3  | 4.7   | 2.8  | 7.8   | 0.5    | 17.8  | -5.6   | 41.1   | -9.9    | 49.7   | -3.0      | 24.4  | -1.1  | 35.4  | -3.9    | 44.2   |      |      |
| 26 -HPIP | 6.0   | -64.0  | -9.1  | -64.3  | 12.8  | -66.5  | 6.5   | -58.1  | 3.6   | -46.1  | 3.2   | -43.2  | 2.8   | -38.7  | 2.5   | -34.7  | 8.2  | -34.1  | 0.2       | -1.4  | -1.6  | -2.8  | 2.6  | 2.6   | -0.6   | 14.4  | -12.2  | 50.2   | -11.7   | 56.6   | -3.3      | 20.9  | -3.4  | 33.4  | -6.1    | 46.6   |      |      |
| 27 -HPIP | 10.4  | -73.7  | -11.5 | -75.2  | 16.4  | -74.7  | 8.5   | -62.7  | 5.6   | -43.6  | 5.2   | -39.7  | 4.8   | -34.2  | 4.3   | -29.4  | 12.1 | -27.6  | 2.3       | 3.5   | 1.0   | 2.1   | 3.5  | 6.1   | 0.5    | 15.3  | -10.7  | 42.5   | -12.2   | 51.1   | -2.9      | 21.1  | -3.3  | 32.8  | -7.0    | 43.0   |      |      |
| 28 -HPIP | 1.3   | -108.8 | -4.3  | -129.1 | 6.2   | -142.9 | 2.0   | -95.3  | 0.0   | -66.8  | 0.3   | -62.6  | 0.0   | -53.0  | -0.1  | -48.2  | 1.0  | -53.3  | -1.5      | -27.2 | -4.7  | -10.2 | 0.4  | -6.6  | -2.7   | 9.0   | -14.0  | -14.5  | -9.2    | -2.2   | -3.9      | 6.7   | -2.9  | 10.2  | -3.5    | 7.6    |      |      |
| 29 -HPIP | 5.5   | -73.1  | -8.2  | -74.0  | 14.0  | -78.2  | 7.0   | -67.1  | 3.0   | -52.1  | 2.4   | -48.5  | 3.3   | -44.5  | 2.9   | -39.8  | 4.9  | -36.8  | 1.0       | -2.5  | 0.8   | -3.5  | 2.6  | 2.7   | -2.0   | 16.5  | -14.6  | 51.1   | -10.4   | 55.9   | -3.5      | 22.9  | -1.6  | 35.4  | -4.0    | 47.5   |      |      |
| 30 -HPIP | 5.6   | -85.3  | -8.0  | -87.9  | 14.1  | -89.5  | 7.3   | -73.5  | 3.2   | -49.5  | 3.2   | -47.7  | 3.6   | -44.7  | 3.6   | -39.6  | 3.2  | -33.9  | 5.4       | -29.1 | 1.6   | 3.1   | 1.7  | 2.1   | 2.8    | 6.7   | -1.5   | 17.7   | -13.1   | 42.6   | -9.8      | 48.7  | -3.1  | 23.3  | -1.3    | 34.6   | -3.7 | 43.3 |
| 31 -HPIP | -22.5 | -71.4  | 19.3  | -72.5  | -14.8 | -73.5  | -16.0 | -63.7  | -13.7 | -47.7  | -13.4 | -44.2  | -12.1 | -41.1  | -11.3 | -37.0  | -9.1 | -33.0  | -10.9     | -9.4  | -14.0 | -11.1 | -3.2 | -5.3  | -3.5   | 3.2   | -22.0  | 28.9   | -5.5    | 30.5   | -4.6      | 6.6   | -1.7  | 16.0  | 2.0     | 24.1   |      |      |
| 32 -HPIP | 8.5   | -228.6 | -11.1 | -229.8 | 12.7  | -225.3 | 8.6   | -199.6 | 6.5   | -145.4 | 6.1   | -133.8 | 6.2   | -127.9 | 5.9   | -114.5 | 7.3  | -84.8  | 4.4       | -29.1 | 1.3   | -27.7 | 3.4  | -16.8 | 1.2    | 5.7   | -8.3   | 41.8   | -6.9    | 48.6   | -0.2      | 16.8  | 0.0   | 31.6  | -2.3    | 41.8   |      |      |
| 33 -HPIP | -0.6  |        |       |        |       |        |       |        |       |        |       |        |       |        |       |        |      |        |           |       |       |       |      |       |        |       |        |        |         |        |           |       |       |       |         |        |      |      |

## S5 EDD plots and charge transfer diagnostic

Table S3: Electron density difference plots and related electron transition parameters of 13-BF<sub>2</sub> dye (See ESI **Fig S1**). Presented results were obtained with aug-cc-pVDZ basis set in vacuum. Red (blue) color marks electron density depletion (gain) upon photon absorption. The contour value was set to 0.002 au.

| DFA             | EDD plots                                                                           | $d_{CT}$ | $q_{CT}$ | $\mu_{ES} - \mu_{GS}$ |
|-----------------|-------------------------------------------------------------------------------------|----------|----------|-----------------------|
|                 |                                                                                     | [Å]      | [e]      | [D]                   |
| BLYP            | 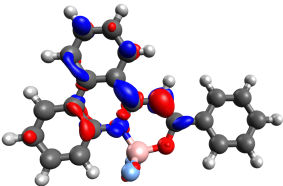   | 1.233    | 0.394    | -2.328                |
| PBE0            |   | 0.742    | 0.420    | -1.480                |
| MN15            |  | 0.588    | 0.437    | -1.234                |
| $\omega$ B97X-D |  | 0.485    | 0.461    | -1.072                |



Table S4: Electron density difference plots and related electron transition parameters of 27-BF<sub>2</sub> dye (See ESI **Fig S1**). Presented results were obtained with aug-cc-pVDZ basis set in vacuum. Red (blue) color marks electron density depletion (gain) upon photon absorption. The contour value was set to 0.002 au.

| DFA             | EDD plots                                                                           | $d_{CT}$ | $q_{CT}$ | $\mu_{ES} - \mu_{GS}$ |
|-----------------|-------------------------------------------------------------------------------------|----------|----------|-----------------------|
|                 |                                                                                     | [Å]      | [e]      | [D]                   |
| BLYP            | 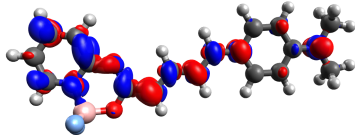   | 4.991    | 0.768    | 16.833                |
| PBE0            |    | 3.982    | 0.587    | 10.175                |
| MN15            |  | 3.508    | 0.552    | 8.306                 |
| $\omega$ B97X-D |  | 2.970    | 0.531    | 6.456                 |

Table S5: Electron density difference plots and related electron transition parameters of 45-HPIP dye (See ESI **Fig S3**). Presented results were obtained with aug-cc-pVDZ basis set in vacuum. Red (blue) color marks electron density depletion (gain) upon photon absorption. The contour value was set to 0.003 au.

| DFA             | EDD plots                                                                           | $d_{CT}$ | $q_{CT}$ | $\mu_{ES} - \mu_{GS}$ |
|-----------------|-------------------------------------------------------------------------------------|----------|----------|-----------------------|
|                 |                                                                                     | [Å]      | [e]      | [D]                   |
| BLYP            | 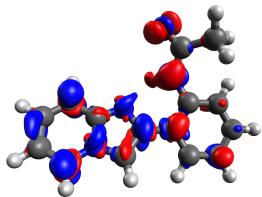   | 3.069    | 0.898    | 5.735                 |
| PBE0            |    | 2.313    | 0.631    | 0.814                 |
| MN15            |  | 1.723    | 0.560    | -0.268                |
| $\omega$ B97X-D |  | 1.416    | 0.550    | -0.558                |

Table S6: Electron density difference plots and related electron transition parameters of 13-HPIP dye (See ESI **Fig S2**). Presented results were obtained with aug-cc-pVDZ basis set in vacuum. Red (blue) color marks electron density depletion (gain) upon photon absorption. The contour value was set to 0.003 au.

| DFA             | EDD plots                                                                           | $d_{CT}$ | $q_{CT}$ | $\mu_{ES} - \mu_{GS}$ |
|-----------------|-------------------------------------------------------------------------------------|----------|----------|-----------------------|
|                 |                                                                                     | [Å]      | [e]      | [D]                   |
| BLYP            | 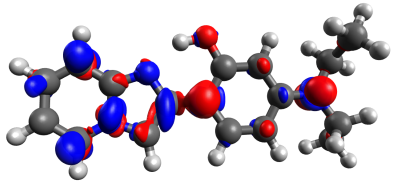   | 3.901    | 0.811    | 12.183                |
| PBE0            |    | 3.597    | 0.811    | 10.395                |
| MN15            |  | 3.195    | 0.741    | 7.408                 |
| $\omega$ B97X-D |  | 2.575    | 0.651    | 4.173                 |

## **S5.1 Differences between respective EDD plots**

Table S7: Differences between respective EDD plots. The contour values were set to 0.002 au and 0.003 au for BF<sub>2</sub> and HPIP dyes respectively.

| Struct.            | Difference EDD plots                                                                |                                                                                      |                                                                                       | ES |
|--------------------|-------------------------------------------------------------------------------------|--------------------------------------------------------------------------------------|---------------------------------------------------------------------------------------|----|
|                    | $\Delta\rho(\text{MN15})-\Delta\rho(\text{BLYP})$                                   | $\Delta\rho(\text{MN15})-\Delta\rho(\text{PBE0})$                                    | $\Delta\rho(\text{MN15})-\Delta\rho(\omega\text{B97X-D})$                             |    |
| 13-BF <sub>2</sub> | 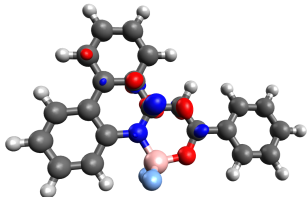   |    |    | LC |
| 27-BF <sub>2</sub> |    |    |    | CT |
| 45-HPIP            |   |   |   | LC |
| 13-HPIP            |  |  |  | CT |

Table S8: Differences between respective EDD plots. Note that the contour value was lowered to 0.001 au.

| Struct.            | Difference EDD plots                                                                |                                                                                      |                                                                                       | ES |
|--------------------|-------------------------------------------------------------------------------------|--------------------------------------------------------------------------------------|---------------------------------------------------------------------------------------|----|
|                    | $\Delta\rho(\text{MN15})-\Delta\rho(\text{BLYP})$                                   | $\Delta\rho(\text{MN15})-\Delta\rho(\text{PBE0})$                                    | $\Delta\rho(\text{MN15})-\Delta\rho(\omega\text{B97X-D})$                             |    |
| 13-BF <sub>2</sub> | 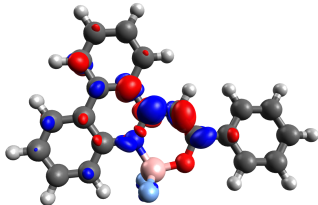   |    |    | LC |
| 27-BF <sub>2</sub> |    |    |    | CT |
| 45-HPIP            |   |   |   | LC |
| 13-HPIP            |  |  |  | CT |

## S6 $\Lambda$ diagnostic

$\Lambda$  quantity represents the degree of spatial overlap between the occupied and virtual orbitals involved in an excitation, which allows to distinguish between local, charge-transfer and Rydberg excitations. By definition,  $\Lambda$  values fall between 0 and 1 and a small value of  $\Lambda$  indicates a long-range excitation; on the other hand a large value signifies a short-range (local) excitation.

Table S9:  $\Lambda$  diagnostic results of BF<sub>2</sub> dyes set. All results were calculated at CAM-B3LYP/aug-cc-pVDZ theory level.

| Structure | $\Lambda$ | Structure | $\Lambda$ |
|-----------|-----------|-----------|-----------|
| 1-BF2     | 0.528     | 16-BF2    | 0.72      |
| 2-BF2     | 0.703     | 17-BF2    | 0.726     |
| 3-BF2     | 0.696     | 18-BF2    | 0.738     |
| 4-BF2     | 0.702     | 19-BF2    | 0.715     |
| 5-BF2     | 0.707     | 20-BF2    | 0.686     |
| 6-BF2     | 0.694     | 21-BF2    | 0.724     |
| 7-BF2     | 0.596     | 22-BF2    | 0.597     |
| 8-BF2     | 0.674     | 23-BF2    | 0.711     |
| 9-BF2     | 0.7       | 24-BF2    | 0.629     |
| 10-BF2    | 0.648     | 25-BF2    | 0.528     |
| 11-BF2    | 0.589     | 26-BF2    | 0.583     |
| 12-BF2    | 0.621     | 27-BF2    | 0.614     |
| 13-BF2    | 0.718     | 28-BF2    | 0.724     |
| 14-BF2    | 0.662     | 29-BF2    | 0.635     |
| 15-BF2    | 0.729     |           |           |

Table S10:  $\Lambda$  diagnostic results of HPIP dyes set. All results were calculated at CAM-B3LYP/aug-cc-pVDZ theory level.

| Structure | $\Lambda$ | Structure | $\Lambda$ |
|-----------|-----------|-----------|-----------|
| 1-HPIP    | 0.664     | 29-HPIP   | 0.499     |
| 2-HPIP    | 0.598     | 30-HPIP   | 0.513     |
| 3-HPIP    | 0.717     | 31-HPIP   | 0.515     |
| 4-HPIP    | 0.487     | 32-HPIP   | 0.433     |
| 5-HPIP    | 0.510     | 33-HPIP   | 0.602     |
| 6-HPIP    | 0.501     | 34-HPIP   | 0.607     |
| 7-HPIP    | 0.543     | 35-HPIP   | 0.528     |
| 8-HPIP    | 0.564     | 36-HPIP   | 0.532     |
| 9-HPIP    | 0.517     | 37-HPIP   | 0.486     |
| 10-HPIP   | 0.522     | 38-HPIP   | 0.528     |
| 11-HPIP   | 0.572     | 39-HPIP   | 0.568     |
| 12-HPIP   | 0.564     | 40-HPIP   | 0.433     |
| 13-HPIP   | 0.465     | 41-HPIP   | 0.563     |
| 14-HPIP   | 0.512     | 42-HPIP   | 0.524     |
| 15-HPIP   | 0.542     | 43-HPIP   | 0.716     |
| 16-HPIP   | 0.537     | 44-HPIP   | 0.657     |
| 17-HPIP   | 0.543     | 45-HPIP   | 0.599     |
| 18-HPIP   | 0.590     | 46-HPIP   | 0.642     |
| 19-HPIP   | 0.547     | 47-HPIP   | 0.644     |
| 20-HPIP   | 0.523     | 48-HPIP   | 0.630     |
| 21-HPIP   | 0.490     | 49-HPIP   | 0.643     |
| 22-HPIP   | 0.541     | 50-HPIP   | 0.597     |
| 23-HPIP   | 0.676     | 51-HPIP   | 0.540     |
| 24-HPIP   | 0.518     | 52-HPIP   | 0.507     |
| 25-HPIP   | 0.512     | 53-HPIP   | 0.668     |
| 26-HPIP   | 0.518     | 54-HPIP   | 0.663     |
| 27-HPIP   | 0.502     | 55-HPIP   | 0.594     |
| 28-HPIP   | 0.689     | 56-HPIP   | 0.542     |
